# Supplementary material
Source: PubMed Central journal article supplement (PMC3695285)

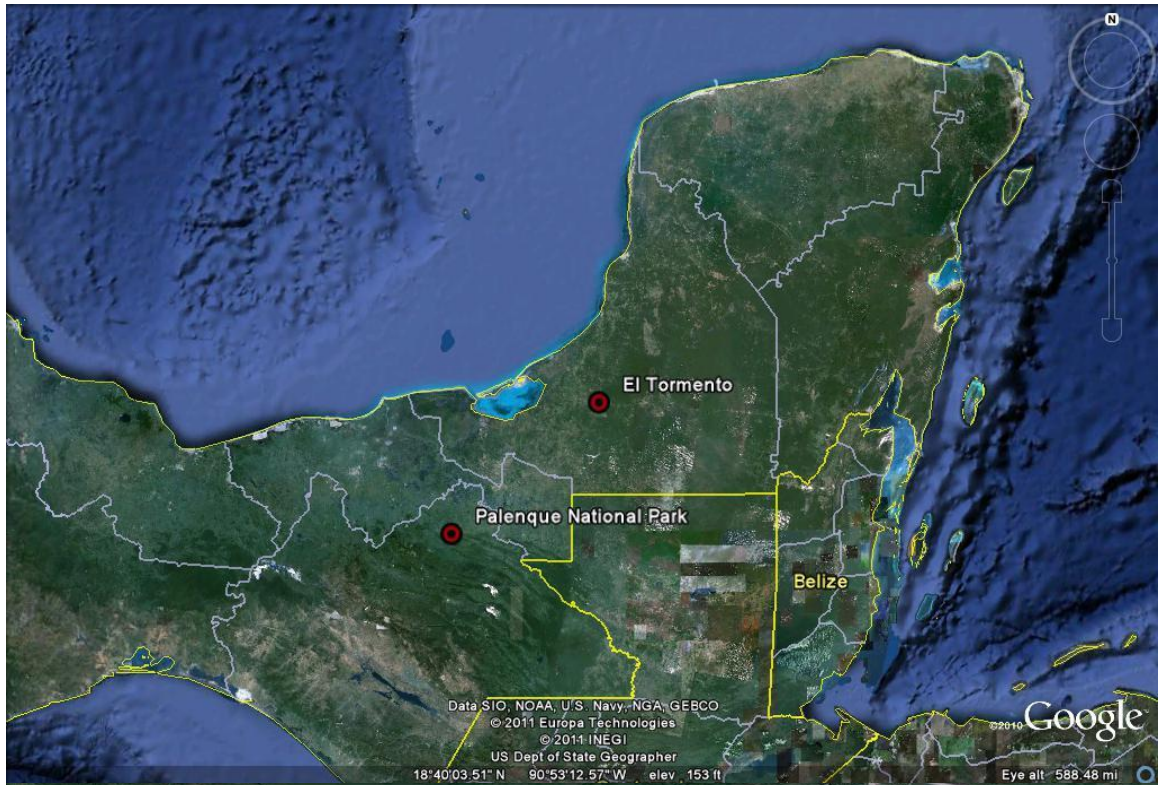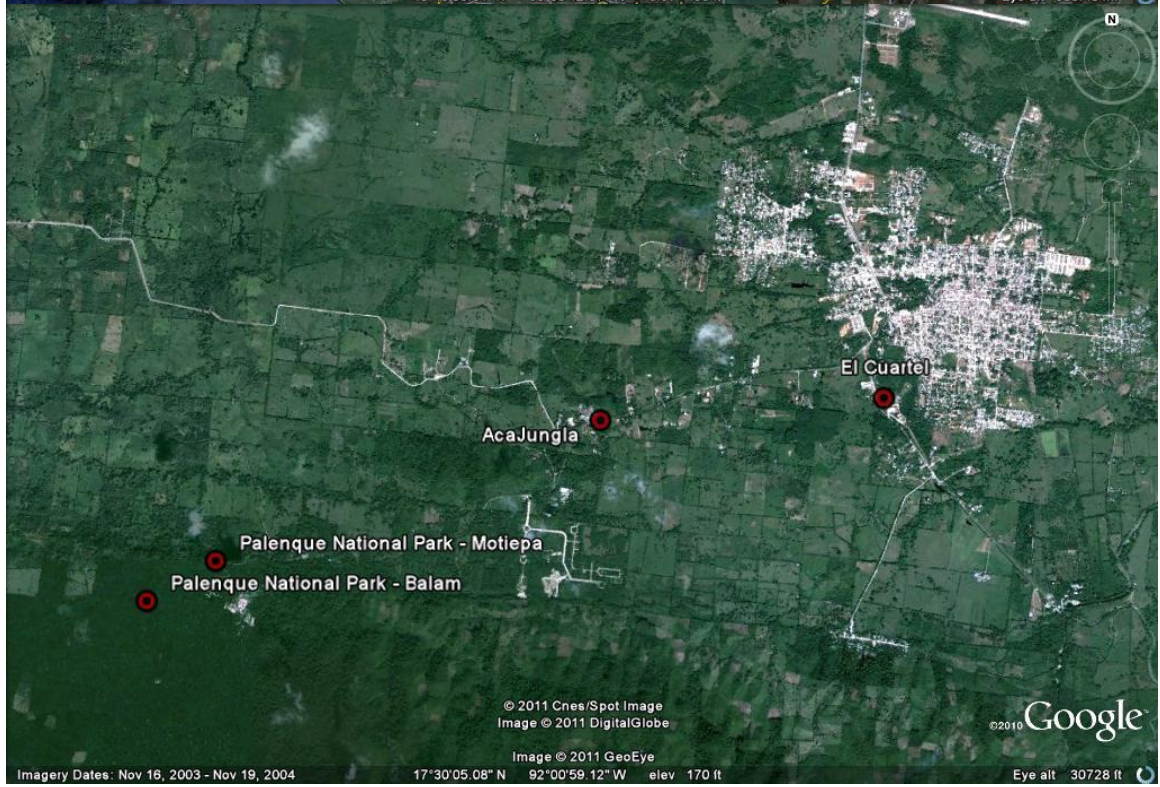

Supplement: ismej201316x2.pdf [file ismej201316x2.pdf]
